# Supplementary material for: Trends in Health Care Access/Experiences: Differential Gains across Sexuality and Sex Intersections before and after Marriage Equality
Source: MDPI journal article supplement (doi:10.3390/ijerph19095075), 2022-04-21
Supplement: s1 [file s1]

**Supplement Table S1.** Spearman's rank-sum correlations<sup>1</sup> between socioeconomic measures and time from years 2013 through 2018 (n=28,961).

|                                    | Correlation with Time |
|------------------------------------|-----------------------|
| <b>Education Level<sup>2</sup></b> | <b>0.12</b>           |
| <b>Income<sup>2</sup></b>          | <b>0.20</b>           |
| <b>Region</b>                      |                       |
| Northeast                          | 0.03                  |
| Midwest                            | -0.00                 |
| South                              | -0.01                 |
| West                               | -0.01                 |
| <b>Employment</b>                  |                       |
| Full Time                          | -0.05                 |
| Part-Time                          | 0.08                  |
| Retired                            | -0.07                 |
| Student/Homemaker                  | -0.02                 |
| Unemployed                         | 0.03                  |
| <b>Marital Status</b>              |                       |
| Single                             | <b>-0.12</b>          |
| Married                            | <b>0.12</b>           |
| Widowed                            | 0.00                  |
| Divorced                           | -0.02                 |
| Separated                          | -0.01                 |

<sup>1</sup>Point-biserial rank-sum correlations used for Region, Employment, and marital status.

<sup>2</sup>Education Level coded as Less than High School High School, College, Graduate Degree. Income coded as \$24,999 or less, \$25,000 to \$49,000, \$50,000 to \$74,999, \$75,000 to \$99,999, \$100,000 or more.

Correlations greater than or equal to 0.10 bolded.
